# Supplementary material for: Serum exosomal miR-4772-3p is a predictor of tumor recurrence in stage II and III colon cancer
Source: PubMed Central journal article supplement (PMC5342811; doi:10.18632/oncotarget.12841), 2016-10-24
Supplement: oncotarget-07-76250-s001.pdf [file oncotarget-07-76250-s001.pdf]

## Serum exosomal miR-4772-3p is a predictor of tumor recurrence in stage II and III colon cancer

### SUPPLEMENTARY FIGURE AND TABLES

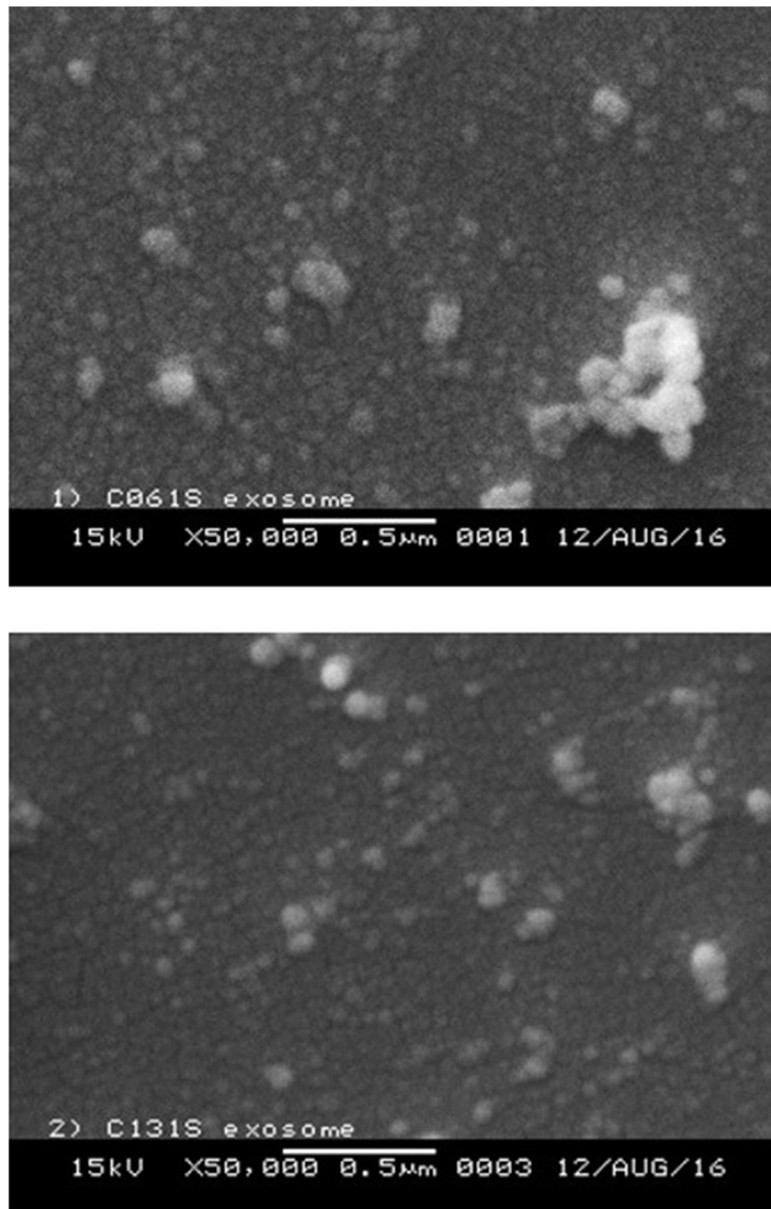

Supplementary Figure S1: Scanning electronic microscopy images of exosomes isolated from serum samples of colon cancer patients.

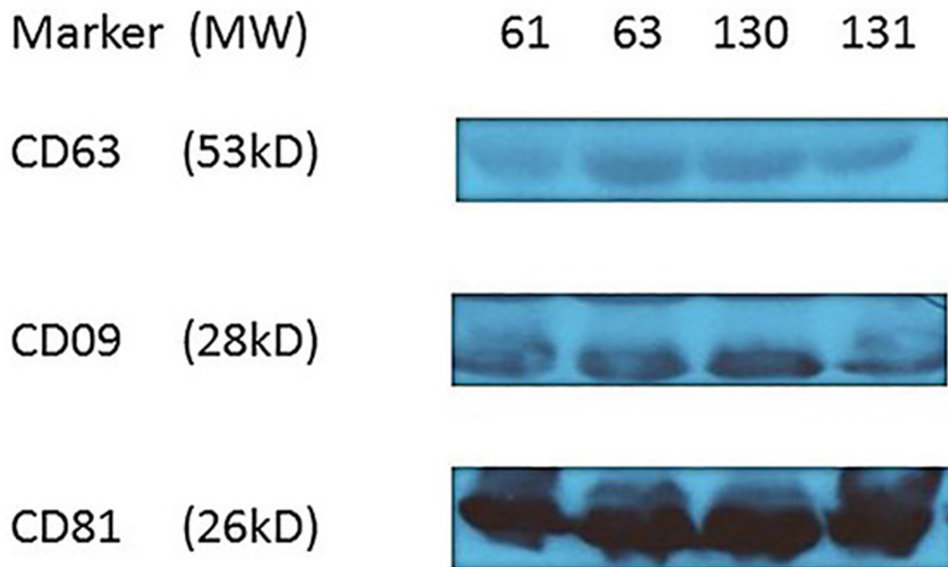

Supplementary Figure S2: Expression of exosome surface markers CD9, CD61 and CD83 in serum exosome extracts from 4 colon cancer patients.

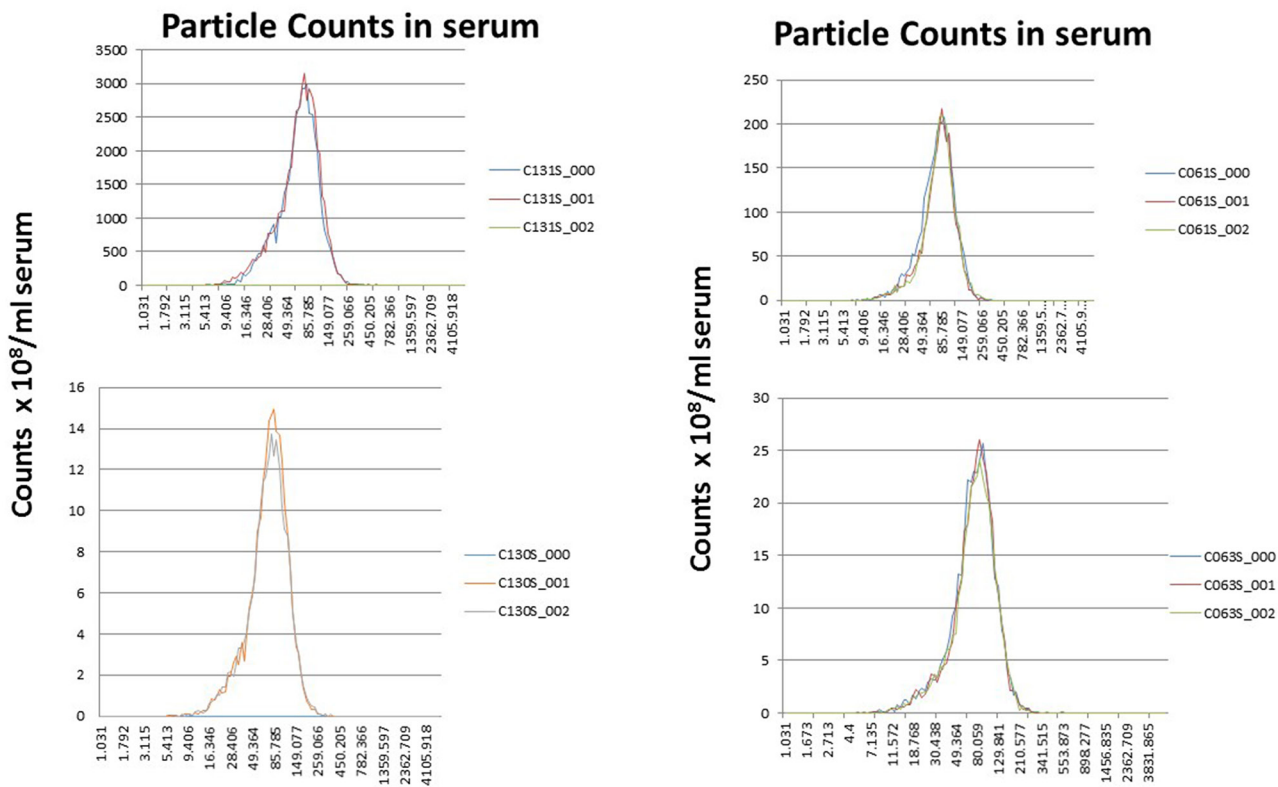

Supplementary Figure S3: Particle counts and size distribution in serum exosome preparation of 4 colon cancer patients as determined by nanoparticle tracking analysis.

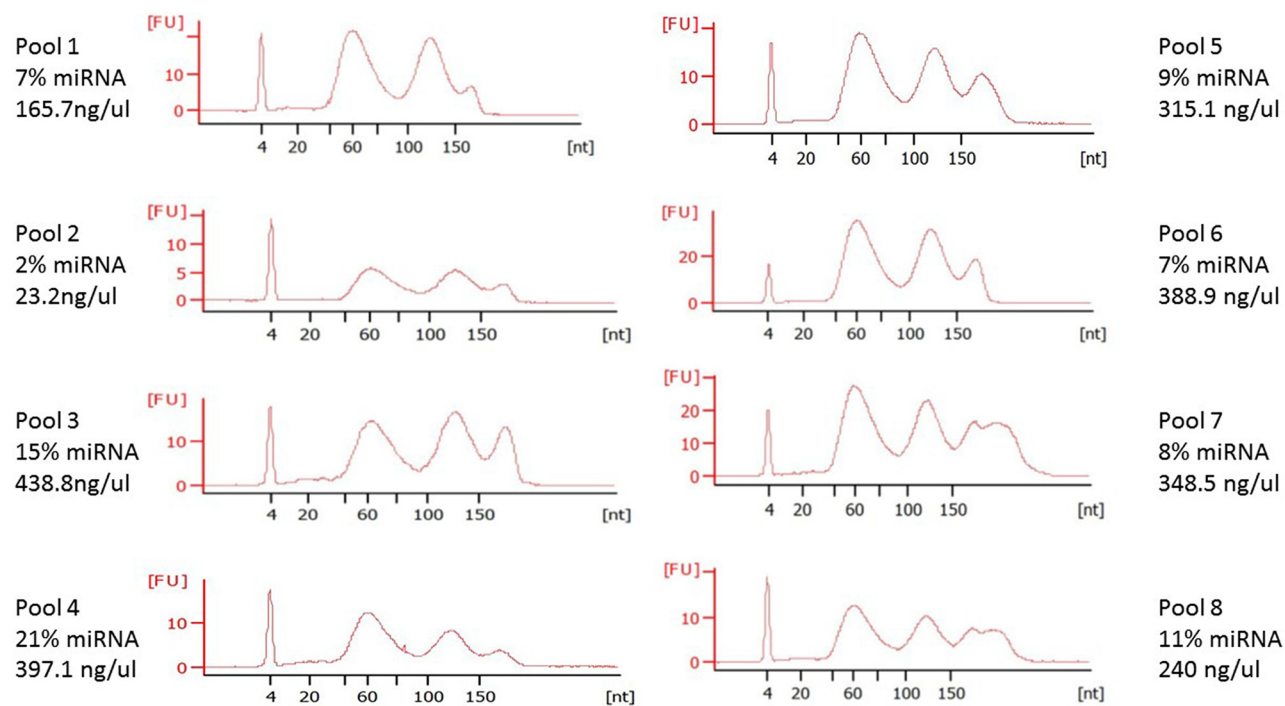

Supplementary Figure S4: Exosomal total RNA quality and percentage of microRNAs in each pooled sample.

Supplementary Table S1: Information on miRNA-sequencing data

| Sample | Total Reads | Trimmed Reads | Too Short After Trimming (<17bps) | Reads sent to Aligner | Aligned Reads | Precursor miRNA Reads | Mature miRNA Reads | Known miRNA with $\geq 5x$ coverage |
|--------|-------------|---------------|-----------------------------------|-----------------------|---------------|-----------------------|--------------------|-------------------------------------|
| 1      | 29766145    | 24346044      | 4424571                           | 25341574              | 10626057      | 2828                  | 3200648            | 605                                 |
| 2      | 23115699    | 19610038      | 4170224                           | 18945475              | 7771578       | 1941                  | 2368380            | 578                                 |
| 3      | 24612665    | 20444473      | 2762484                           | 21850181              | 9374227       | 2286                  | 3345935            | 552                                 |
| 4      | 21345251    | 18194261      | 2702998                           | 18642253              | 9383931       | 3290                  | 3758687            | 600                                 |
| 5      | 22433569    | 18508709      | 4009229                           | 18424340              | 5034894       | 1153                  | 1178083            | 497                                 |
| 6      | 21604833    | 17723515      | 3809950                           | 17794883              | 6610641       | 1499                  | 1366346            | 482                                 |
| 7      | 23020710    | 19009264      | 3124714                           | 19895996              | 9637725       | 2573                  | 1713088            | 521                                 |
| 8      | 20421669    | 17082159      | 4011159                           | 16410510              | 5811217       | 1880                  | 1417724            | 511                                 |

Sample 1-4: non-recurrent; sample 5-8: recurrent

Supplementary Table S2: Differentially expressed miRNAs with nominal significance.

See Supplementary File 1

**Supplementary Table S3: Results of IPA analysis on 146 differentially expressed miRNAs**

| <b>Molecular and cellular functions</b>       |                     |                    |
|-----------------------------------------------|---------------------|--------------------|
| <b>Name</b>                                   | <b>P-values</b>     | <b>#/molecules</b> |
| Cellular Development                          | 4.78E-02 - 4.60E-06 | 27                 |
| Cellular Growth and Proliferation             | 4.78E-02 - 4.60E-06 | 25                 |
| Cell Cycle                                    | 4.87E-02 - 8.44E-06 | 7                  |
| Cellular Movement                             | 2.82E-02 - 2.38E-05 | 14                 |
| Cell Death and Survival                       | 4.71E-02 - 6.55E-04 | 19                 |
| <b>Top Analysis Ready Molecules</b>           |                     |                    |
| <b>Molecules</b>                              | <b>P Value</b>      |                    |
| miR-451a (and other miRNAs w/seed AACCGUU)    | 7.19E-07            |                    |
| miR-103-3p (and other miRNAs w/seed GCAGCAU)  | 2.74E-06            |                    |
| miR-4732-5p (miRNAs w/seed GUAGAGC)           | 5.27E-06            |                    |
| miR-3688-3p (and other miRNAs w/seed AUGGAAA) | 1.43E-05            |                    |
| miR-485-3p (and other miRNAs w/seed UCAUACA)  | 1.43E-05            |                    |
| miR-185-5p (and other miRNAs w/seed GGAGAGA)  | 5.37E-05            |                    |
| miR-486-5p (and other miRNAs w/seed CCUGUAC)  | 7.81E-05            |                    |
| miR-3143 (miRNAs w/seed UAACAUU)              | 8.90E-05            |                    |
| miR-4433b-5p (miRNAs w/seed UGUCCCA)          | 9.72E-05            |                    |
| miR-151-5p (and other miRNAs w/seed CGAGGAG)  | 2.65E-04            |                    |

Supplementary Table S4: Association of MIR-4772-3P and tumor recurrence by tumor stage and chemotherapy

| Chemotherapy <sup>a</sup> | Tumor Stage | MIR-4772-3P Expression <sup>b</sup> | Non-recurrent n (%) | Recurrent n (%) | P value           |
|---------------------------|-------------|-------------------------------------|---------------------|-----------------|-------------------|
| None                      | Stage II    | High                                | 0                   | 1 (100)         |                   |
|                           |             | Low                                 | 0                   | 0               | NA <sup>c</sup>   |
|                           | Stage III   | High                                | 1 (33)              | 2 (67)          |                   |
|                           |             | Low                                 | 1 (100)             | 0               | 1.0 <sup>d</sup>  |
|                           | Combined    | High                                | 1 (25)              | 3 (75)          |                   |
|                           |             | Low                                 | 1 (100)             | 0               | 0.17              |
| FOLFOX                    | Stage II    | High                                | 12 (86)             | 2 (14)          |                   |
|                           |             | Low                                 | 0                   | 1 (100)         | 0.20 <sup>d</sup> |
|                           | Stage III   | High                                | 34 (82)             | 8 (18)          |                   |
|                           |             | Low                                 | 1 (10)              | 8 (90)          | <0.001            |
|                           | Combined    | High                                | 46 (82)             | 10 (18)         |                   |
|                           |             | Low                                 | 1 (10)              | 9 (90)          | <0.001            |
| Other types               | Stage II    | High                                | 2 (100)             | 0               |                   |
|                           |             | Low                                 | 1 (50)              | 1 (50)          | 1.0 <sup>d</sup>  |
|                           | Stage III   | High                                | 5 (63)              | 3 (37)          |                   |
|                           |             | Low                                 | 0 (56)              | 1 (44)          | 0.44 <sup>d</sup> |
|                           | Combined    | High                                | 7 (70)              | 3 (30)          |                   |
|                           |             | Low                                 | 1 (33)              | 2 (67)          | 0.25              |

<sup>a</sup>None: no chemotherapy; FOLFOX: Oxaliplatin with fluorouracil (5FU) and folinic acid; Other types: XELOX (capecitabine plus oxaliplatin), capecitabine or 5FU alone, and FOLFIRI (Irinotecan with 5FU and folinic acid).

<sup>b</sup>High: MIR-4772-3P  $\Delta$ CT value <27.88; Low: : MIR-4772-3P  $\Delta$ CT value  $\geq$  27.88.

<sup>c</sup>NA: P value could not be calculated because two or more cells are empty.

<sup>d</sup>P values were calculated using Fisher's Exact test (two sided).

Supplementary Table S5: Potential gene targets of miR-4772-3p

| Gene           | Gene name                                                                               | Total context++ score |
|----------------|-----------------------------------------------------------------------------------------|-----------------------|
| <i>TFRC</i>    | transferrin receptor                                                                    | -1.2                  |
| <i>RTN4</i>    | reticulon 4                                                                             | -1.03                 |
| <i>CARD16</i>  | caspace recruitment domain family, member 16                                            | -0.71                 |
| <i>IL13</i>    | interleukin 13                                                                          | -0.7                  |
| <i>TTC9C</i>   | tetratricopeptide repeat domain 9C                                                      | -0.75                 |
| <i>RAC1</i>    | ras-related C3 botulinum toxin substrate 1 (rho family, small GTP binding protein Rac1) | -0.68                 |
| <i>MRPL19</i>  | mitochondrial ribosomal protein L19                                                     | -0.83                 |
| <i>PIGY</i>    | phosphatidylinositol glycan anchor biosynthesis, class Y                                | -0.65                 |
| <i>CPEB1</i>   | cytoplasmic polyadenylation element binding protein 1                                   | -0.64                 |
| <i>MDH2</i>    | malate dehydrogenase 2, NAD (mitochondrial)                                             | -0.63                 |
| <i>COX7C</i>   | cytochrome c oxidase subunit VIIc                                                       | -0.62                 |
| <i>SLC3A2</i>  | solute carrier family 3 (amino acid transporter heavy chain), member 2                  | -0.62                 |
| <i>RAB9A</i>   | RAB9A, member RAS oncogene family                                                       | -0.93                 |
| <i>IL36B</i>   | interleukin 36, beta                                                                    | -0.6                  |
| <i>STK31</i>   | serine/threonine kinase 31                                                              | -0.58                 |
| <i>ZNF785</i>  | zinc finger protein 785                                                                 | -0.58                 |
| <i>RAE1</i>    | ribonucleic acid export 1                                                               | -0.56                 |
| <i>CEP57L1</i> | centrosomal protein 57kDa-like 1                                                        | -0.61                 |
| <i>PSMA1</i>   | proteasome (prosome, macropain) subunit, alpha type, 1                                  | -0.57                 |
| <i>ITGA8</i>   | integrin, alpha 8                                                                       | -0.56                 |

The context++ score is the sum of the contribution of 14 features (See reference 20).

Supplementary Table S6: Primer sequences for the 10 miRNAs tested by RT-PCR

| ID               | Prime sequence (stem-loop)                                                               |
|------------------|------------------------------------------------------------------------------------------|
| Hsa-mir-4732     | GAGGGAGCTGTAGAGCAGGGAGCAGGAAGCTGTGTGTGTCCAG<br>CCCTGACCTGTCCTGTTCTGCCCCAGCCCCTC          |
| Hsa-mir-451a     | CTTGGGAATGGCAAGGAAACCGTTACCATTACTGAGTTTAGTAA<br>TGGTAATGGTTCTCTTGCTATAACCCAGA            |
| Hsa-mir-3200-3p  | GGTGGTCGAGGGAATCTGAGAAGGCGCACAAGGTTTGTGTCCAA<br>TACAGTCCACACCTTGCGCTACTCAGGTCTGCTCGTGCCT |
| Hsa-mir-3143     | TAGATAACATTGTAAAGCGCTTCTTTTCGCGGTTGGGCTGGAGCAA<br>CTCTTTACAATGTTTCTA                     |
| Hsa-mir-485-3p   | ACTTGGAGAGAGGCTGGCCGTGATGAATTCGATTCATCAAAGCGA<br>GTCATACACGGCTCTCCTCTCTTTTAGT            |
| Hsa-mir-4772-3p  | GTGATTGCCTCTGATCAGGCAAAATTGCAGACTGTCTTCCCAAATA<br>GCCTGCAACTTTGCCTGATCAGAGGCAGTCAC       |
| Hsa-mir-1255b-5p | TACGGATGAGCAAAGAAAGTGGTTTCTTAAAATGGAATCTACTCT<br>TTGTGAAGATGCTGTGAA                      |
| Hsa-mir-1180     | GCTGCTGGACCCACCCGGCCGGAATAGTGCTCCTGGTTGTTTCC<br>GGCTCGCGTGGGTGTGTCGGCGGC                 |
| Hsa-mir-451b     | TGGGTATAGCAAGAGAACCATTACCATTACTAAACTCAGTAATGGTA<br>ACGGTTTCCTTGCCATTCCCA                 |
| Hsa-mir-3200-5p  | GGTGGTCGAGGGAATCTGAGAAGGCGCACAAGGTTTGTGTCCAATA<br>CAGTCCACACCTTGCGCTACTCAGGTCTGCTCGTGCCT |
